# Supplementary material for: The Influence of Bloom Index, Endotoxin Levels and Polyethylene Glycol Succinimidyl Glutarate Crosslinking on the Physicochemical and Biological Properties of Gelatin Biomaterials
Source: MDPI journal article supplement (doi:10.3390/biom11071003), 2021-07-09
Supplement: s1 [file s1]

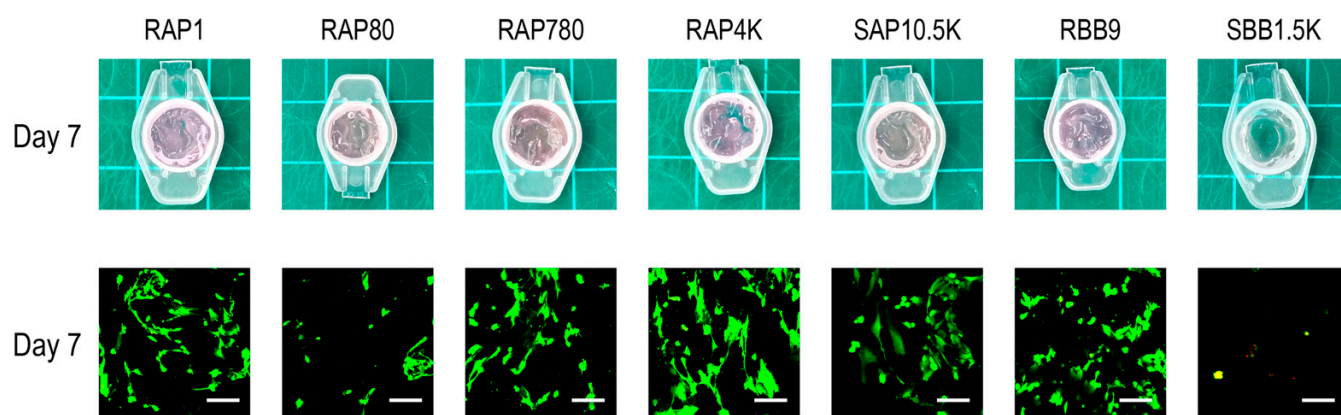

**Supplementary Figure S1.** 200,000 human adipose derived stem cells were seeded per 1 mM polyethylene glycol succinimidyl glutarate crosslinked gelatin hydrogel. Live cells: Green. Dead cells: Red. Scale bar: 100  $\mu$ m
